# Supplementary material for: Identification of acetylcholinesterase inhibitors from traditional medicinal plants for Alzheimer's disease using in silico and machine learning approaches
Source: Royal Society of Chemistry journal article supplement (doi:10.1039/d4ra05073h), 2024-01-01
Supplement: d4ra05073h1.pdf [file d4ra05073h1.pdf]

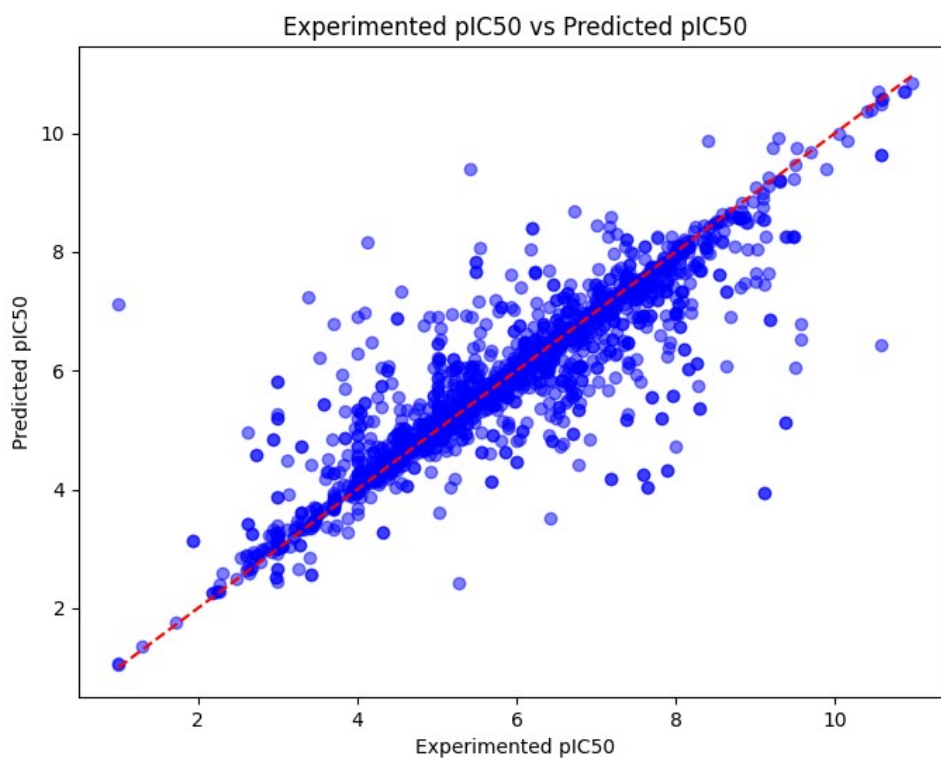

**Fig. S1** Plot comparing the experimental pIC50 values to the predicted pIC50 values obtained from the model using fingerprint descriptors.
