# Supplementary material for: Identification of acetylcholinesterase inhibitors from traditional medicinal plants for Alzheimer's disease using in silico and machine learning approaches
Source: Royal Society of Chemistry journal article supplement (doi:10.1039/d4ra05073h), 2024-01-01
Supplement: d4ra05073h3.pdf [file d4ra05073h3.pdf]

| S.I. | Local Name                  | Scientific name                 | Traditional Use                                                                                                                                                                                              | Citations  |
|------|-----------------------------|---------------------------------|--------------------------------------------------------------------------------------------------------------------------------------------------------------------------------------------------------------|------------|
| 1.   | Khudijam                    | <i>Cleistocalyx nervosum</i>    | Antidiabetic, anti-neuroinflammatory, and activity                                                                                                                                                           | [41]       |
| 2.   | Kwao Krua                   | <i>Pueraria mirifica</i>        | Anti-mutagenic, and antioestrogenic activity                                                                                                                                                                 | [42], [43] |
| 3.   | Snake jasmine               | <i>Rhinacanthus nasutus</i>     | Anti-inflammatory, and anti-obesity activity                                                                                                                                                                 | [44], [45] |
| 4.   | Sheora                      | <i>Streblus asper</i>           | Anticancer, anti-allergic, antifilarial, anti-parkinson, hepato-protective, antineoplastic, anti-allergic, and anti-inflammatory activity                                                                    | [46],      |
| 5.   | Brahmi                      | <i>Bacopa monnieri</i>          | Anti-convulsant, anti-depressant, analgesic, hepatoprotective, anti-inflammatory, anxiolytic, anti-microbial, anti-ulcerogenic, anti-h. Pylori, apoptogenic, anti-neoplastic, and immunostimulatory activity | [47]       |
| 6.   | Haritaki                    | <i>Terminalia chebula</i>       | Antipyretic, astringent, spasmolytic, expectorant, antiviral, antiasthmatic, and hypoglycemic activity                                                                                                       | [47]       |
| 7.   | Satamuli                    | <i>Asparagus racemosus</i>      | Anticancer, and anti-inflammation activity                                                                                                                                                                   | [48]       |
| 8.   | Bitter fennel, sweet fennel | <i>Foeniculum vulgare</i>       | Anti-ulcer, antinsomnia, and anti-cancer activity                                                                                                                                                            | [49]       |
| 9.   | Neem                        | <i>Azadirachta indica</i> Juss. | Insecticide, anti-diabetic, and anti-cancer activity                                                                                                                                                         | [50], [51] |
| 10.  | Picrorhiza, katuka, kutki   | <i>Picrorhiza kurroa</i>        | Antipyretic, anti-arthritis, and antidiarrheic activity                                                                                                                                                      | [52]       |
| 11.  | Bonshapla, Bon mosur        | <i>Fumaria indica</i>           | Antiviral, antipyretic, and anthelmintic activity                                                                                                                                                            | [53]       |
| 12.  | Bharbharra Jawasa           | <i>Alhagi pseudalhagi</i>       | Antibacterial, anti-urolithic, anti-ulcer, anti-anginal, antipyretic, antioxidant, diuretic, inflammation, and anti-arthritis activity                                                                       | [54]       |
| 13.  | Rasayana herb               | <i>Pluchea lanceolata</i>       | Anti-inflammatory, anti-arthritis, anticancer, antipyretic, antioxidant, and antimalarial activity.                                                                                                          | [55]       |
| 14.  | Agnimantha                  | <i>Premna mucronata</i>         | Antibacterial, anti-inflammatory, and antioxidant activity                                                                                                                                                   | [56]       |

|     |                          |                              |                                                                                                                     |      |
|-----|--------------------------|------------------------------|---------------------------------------------------------------------------------------------------------------------|------|
| 15. | Beula                    | <i>Semecarpus anacardium</i> | Anti-atherosclerotic, anti-inflammatory, antioxidant, neuroprotective, hypoglycemic, and anti-carcinogenic activity | [57] |
| 16. | Lal berela               | <i>Sida cordifolia</i>       | Anti-inflammatory and analgesic, anticancer, diuretic, hypoglycemic, and anthelmintic activity                      | [58] |
| 17. | Gulanha                  | <i>Tinospora cordifolia</i>  | Anti-diabetic, anti-cancer, immunomodulatory, antipyretic, hypolipidaemic, anti-arthritic, and anti-viral activity  | [59] |
| 18. | Hog plum                 | <i>Spondias mombin</i>       | Antioxidant, anti-inflammatory, gastroprotective, antitumor and antiangiogenic, and antiulcer activity.             | [60] |
| 19. | Guinea pepper            | <i>Aframomum melegueta</i>   | Anti-diabetic, anti-tumor, anti-cancer, and anti-inflammatory activity                                              | [61] |
| 20. | Poison devil's-pepper    | <i>Rauwolfia vomitoria</i>   | Antipsychotic effect, anti-inflammatory, antipyretic, anti-cancer, and anti-diabetic activity                       | [62] |
| 21. | African oil palm         | <i>Elaeis guineensis</i>     | Anti-inflammatory, anti-bacterial, anti-cancer, anti-oxidant activity, and anti-diabetic activity                   | [63] |
| 22. | Bellyache bush physicnut | <i>Jatropha curcas</i>       | Anti-bacterial, anti-fungal, and analgesic activity                                                                 | [64] |
| 23. | Ceylon spinach           | <i>Talinum triangulare</i>   | Antioxidant activity                                                                                                | [65] |
| 24. | Flat crown               | <i>Albizia adianthifolia</i> | Anti-diabetic, analgesic, and antiviral activity                                                                    | [66] |
| 25. | Coral plant              | <i>Jatropha multifida</i>    | Antimicrobial, anti-inflammatory and antioxidant activity                                                           | [67] |
