# Supplementary material for: Identification of acetylcholinesterase inhibitors from traditional medicinal plants for Alzheimer's disease using in silico and machine learning approaches
Source: Royal Society of Chemistry journal article supplement (doi:10.1039/d4ra05073h), 2024-01-01
Supplement: d4ra05073h4.pdf [file d4ra05073h4.pdf]

| <b>SL No.</b> | <b>Title (PubChem ID)</b> | <b>Phytochemicals Name</b>                                                                                               | <b>pIC50</b> |
|---------------|---------------------------|--------------------------------------------------------------------------------------------------------------------------|--------------|
| 1             | 27208                     | 3-Cyclohexen-1-ol 1-(15-dimethyl-4-hexenyl)-4-methyl                                                                     | 5.766400     |
| 2             | 3152                      | Donepezil                                                                                                                | 5.497164     |
| 3             | 4114                      | Methoxsalen                                                                                                              | 5.462993     |
| 4             | 5280863                   | Kaempferol                                                                                                               | 5.453437     |
| 5             | 12441                     | Bulbocapnine                                                                                                             | 5.325781     |
| 6             | 1550607                   | Auraptene                                                                                                                | 5.309136     |
| 7             | 102267534                 | 13-Methyl-571719-tetraoxa-13-azoniahexacyclo[12.10.0.0210.048.01523.01620]tetracos-1(24)24(8)9111315(23)16(20)21-nonaene | 5.308796     |
| 8             | 15161648                  | (6Z)-6-[[6-[2-(dimethylamino)ethyl]-13-benzodioxol-5-yl]methylidene]-[13]dioxolo[45-g]isoindol-8-one                     | 5.292476     |
| 9             | 1549992                   | Bisabolol                                                                                                                | 5.295872     |
| 10            | 11019992                  | o-Menth-2-ene 4-isopropylidene-1-vinyl                                                                                   | 5.295872     |
| 11            | 445070                    | trans-trans-Farnesol                                                                                                     | 5.289255     |
| 12            | 5284507                   | trans-Nerolidol                                                                                                          | 5.285173     |
| 13            | 12300148                  | 6-Epi-beta-bisabolol                                                                                                     | 5.284777     |
| 14            | 441005                    | (+)-delta-Cadinene                                                                                                       | 5.254739     |
| 15            | 6432404                   | (+)-gamma-Cadinene                                                                                                       | 5.254739     |
| 16            | 10248                     | Elemicin                                                                                                                 | 5.231153     |
| 17            | 3085362                   | Gigantol                                                                                                                 | 5.223878     |
| 18            | 1549107                   | cis-cis-Farnesol                                                                                                         | 5.218536     |
| 19            | 1549108                   | (2Z,6E)-Farnesol                                                                                                         | 5.218536     |
| 20            | 1549109                   | (E,Z)-Farnesol                                                                                                           | 5.218536     |
| 21            | 24838                     | Hexyl 2-methylbutanoate                                                                                                  | 5.204709     |
| 22            | 638014                    | beta-Ionone                                                                                                              | 5.207413     |
| 23            | 10856614                  | alpha-Selinene                                                                                                           | 5.193275     |
| 24            | 442393                    | beta-Selinene                                                                                                            | 5.193275     |
| 25            | 1742210                   | beta-CARYOPHYLLENE OXIDE                                                                                                 | 5.188125     |
| 26            | 6432312                   | (1S,2S)-1-ethenyl-1-methyl-4-propan-2-ylidene-2-prop-1-en-2-ylcyclohexane                                                | 188678       |

|    |          |                                                                                                  |          |
|----|----------|--------------------------------------------------------------------------------------------------|----------|
| 27 | 6537302  | (3Z)-3-[[6-[2-(dimethylamino)ethyl]-13-benzodioxol-5-yl]methylidene]-6,7-dimethoxyisoindol-1-one | 5.188678 |
| 28 | 10228    | Osthol                                                                                           | 5.176082 |
| 29 | 1803558  | Meranzin                                                                                         | 5.147846 |
| 30 | 5281515  | Caryophyllene                                                                                    | 5.148371 |
| 31 | 12309449 | (RR)-1-isopropyl-4-methyl-3-(prop-1-en-2-yl)-4-vinylcyclohexene                                  | 5.146411 |
| 32 | 86374)   | Allixin                                                                                          | 5.138466 |
