# Supplementary material for: Identification of acetylcholinesterase inhibitors from traditional medicinal plants for Alzheimer's disease using in silico and machine learning approaches
Source: Royal Society of Chemistry journal article supplement (doi:10.1039/d4ra05073h), 2024-01-01
Supplement: d4ra05073h5.pdf [file d4ra05073h5.pdf]

| SN | Title (PubChem id) | Phytochemicals names                                                                                                                     | Docking scores |
|----|--------------------|------------------------------------------------------------------------------------------------------------------------------------------|----------------|
| 1  | 27208              | 3-Cyclohexen-1-ol, 1-(1,5-dimethyl-4-hexenyl)-4-methyl-                                                                                  | -5.22589       |
| 2  | 4114               | Methoxsalen                                                                                                                              | -6.81928       |
| 3  | 3152               | Donepezil                                                                                                                                | -10.76         |
| 4  | 5280863            | Kaempferol                                                                                                                               | -6.80479       |
| 5  | 1803558            | Meranzin                                                                                                                                 | -6.02545       |
| 6  | 12441              | Bulbocapnine                                                                                                                             | -11.44         |
| 7  | 3085362            | Gigantol                                                                                                                                 | -6.53888       |
| 8  | 1742210            | beta-caryophyllene oxide                                                                                                                 | -5.0152        |
| 9  | 10228              | Osthol                                                                                                                                   | -5.79098       |
| 10 | 102267534          | 13-Methyl-5,7,17,19-tetraoxa-13-azoniahexacyclo[12.10.0.0.2,10.04,8.015,23.016,20]tetracos-1(24),2,4(8),9,11,13,15(23),16(20),21-nonaene | -11.26         |
| 11 | 10248              | Elemicin                                                                                                                                 | -5.34565       |
| 12 | 445070             | trans,trans-Farnesol                                                                                                                     | -7.051432      |
| 13 | 1549107            | cis,cis-Farnesol                                                                                                                         | -2.76703       |
| 14 | 1549108            | (2Z,6E)-Farnesol                                                                                                                         | -2.43306       |
| 15 | 1549109            | (E,Z)-farnesol                                                                                                                           | -3.08826       |
| 16 | 24838              | Hexyl 2-methylbutanoate                                                                                                                  | -1.18347       |
| 17 | 1549992            | Bisabolol                                                                                                                                | -6.46758       |
| 18 | 11019992           | o-Menth-2-ene, 4-isopropylidene-1-vinyl-                                                                                                 | -5.35341       |
| 19 | 15161648           | (6Z)-6-[[6-[2-(dimethylamino)ethyl]-1,3-benzodioxol-5-yl]methylidene]-[1,3]dioxolo[4,5-g]isoindol-8-one                                  | -12.65         |
| 20 | 1550607            | Auraptene                                                                                                                                | -7.14465       |
| 21 | 441005             | (+)-delta-Cadinene                                                                                                                       | -5.66826       |
| 22 | 6432404            | (+)-gamma-Cadinene                                                                                                                       | -5.71785       |
| 23 | 10856614           | alpha-Selinene                                                                                                                           | -5.04896       |
| 24 | 442393             | beta-Selinene                                                                                                                            | -5.96309       |
| 25 | 6432312            | (1S,2S)-1-ethenyl-1-methyl-4-propan-2-ylidene-2-prop-1-en-2-ylcyclohexane                                                                | -4.68998       |
| 26 | 6537302            | (3Z)-3-[[6-[2-(dimethylamino)ethyl]-1,3-benzodioxol-5-yl]methylidene]-6,7-dimethoxyisoindol-1-one                                        | -8.018543      |
| 27 | 12309449           | (R,R)-1-isopropyl-4-methyl-3-(prop-1-en-2-yl)-4-vinylcyclohexene                                                                         | -4.67205       |
| 28 | 12300148           | 6-Epi-beta-bisabolol                                                                                                                     | -5.2258        |
| 29 | 86374              | Allixin                                                                                                                                  | -6.3373        |
| 30 | 638014             | beta-Ionone                                                                                                                              | -6.52592       |
| 31 | 5284507            | trans-Nerolidol                                                                                                                          | -2.29071       |
| 32 | 5281515            | Caryophyllene                                                                                                                            | -5.19744       |
